# Supplementary material for: The use of vocal coordination in male African elephant group departures: evidence of active leadership and consensus
Source: PeerJ journal article supplement (doi:10.7717/peerj.17767), 2024-07-22
Supplement: DataS2.xlsx [file DataS2.xlsx]

## Sheet: Meta
Data S2 - mean acoustic parameters for each individual
The use of vocal coordination in male African elephant group departures: evidence of active leadership and consensus
Caitlin E. O'Connell-Rodwell, Jodie L. Berezin, Alessio Pignatelli, Timothy C. Rodwell
Description of Variables:
ElephantID	Individual elephant ID number
Freq5	Frequency 5%
CenterFreq	Center frequency
Freq95	Frequency 95%
BW90	Bandwidth 90%
FundamentalFreq	Fundamental Frequency
Duration	Total time of rumble (seconds)
*Means are provided instead of all raw acoustic data due to being part of an ongoing study*
*For any questions, please reach out to the corresponding author, CEO-R at ceoconnell@stanford.edu*

## Sheet: DataS2
ElephantID	Freq5	FundamentalFreq	CenterFreq	Freq95	BW90	Duration
#18	11.04	13.29	16.89	70.95	59.91	4.57
#22	12.93	13.99	28.8	78.02	65.09	4.04
#25	14.16	14.29	31.25	81.01	66.85	4.22
#46	10.89	12.99	19.52	82.22	71.33	4.55
#48	8.06	13.78	28.56	106.2	98.15	2.49
#61/#132 (1)	9.52	13.07	13.73	45.04	35.52	3.94
#61/#132 (2)	13.18	13.28	67.38	96.68	83.5	4.16
#65	11.72	13.09	20.3	64.45	52.73	4.25
#67	7.32	21.75	24.9	146.48	139.16	2.53
#76	13.18	13.64	25.78	77.01	63.83	5.96
#83	10.25	12.17	19.41	76.54	66.28	2.44
#84	11.43	12.49	24.9	87.31	75.88	4.32
#105/#69 (1)	16.11	16.5	74.71	96.68	80.57	3.24
#105/#69 (2)	9.52	13.87	23.68	87.4	77.88	3.01
#118	17.58	16.56	36.62	92.29	74.71	5.58
#119	11.13	13.63	20.22	85.55	74.41	3.89
#146	10.99	12.71	24.17	82.76	71.78	3.01
Unk1	10.99	11.48	17.58	24.9	13.92	2.94
Unk2	10.25	13.97	14.65	89.36	79.1	4.13
